# Supplementary material
Source: Springer Nature journal article supplement (https://www.springermedizin.de/resource/supplementary/13054_2013_2463_MOESM5_ESM.pdf/9714078)

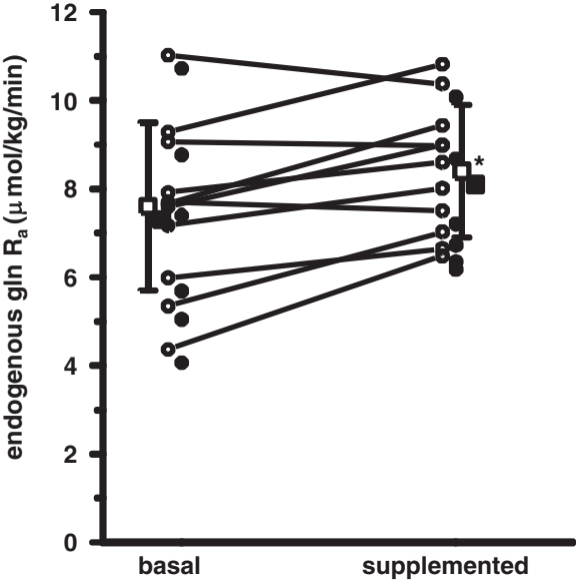

Supplement: MOESM5 [file 9714078]
